# Supplementary material
Source: publisher figshare collection journal article supplement (https://acs.figshare.com/ndownloader/files/22666184)
Supplement: Supplementary file 1 [file 22666184]

## Anthocyanin profiling of maize grains using DIESI-MSQD reveals that cyanidin-based derivatives predominate in purple corn, whereas pelargonidin-based molecules occur in red-pink varieties from Mexico

Peniche-Pavía & Tiessen 2020

- Sample information (Table S1-2)
- A visual explanation for the mass methods used (S1),
- Fragmentation patterns for anthocyanin ions (S2-10),
- Extra heatmaps (S11-S12)
- Boxplots for selected anthocyanins (S13-18).

| Code    | mean $\pm$ SD   | Code    | mean $\pm$ SD   | Code    | mean $\pm$ SD   |
|---------|-----------------|---------|-----------------|---------|-----------------|
| EO1_Pur | 0.59 $\pm$ 0.03 | EO3_Red | 0.42 $\pm$ 0.02 | VM2_Lpu | 0.28 $\pm$ 0.02 |
| EO1_Red | 0.54 $\pm$ 0.03 | EO3_Lpu | 0.48 $\pm$ 0.05 | VM2_Yew | 0.32 $\pm$ 0.03 |
| EO1_Lpu | 0.59 $\pm$ 0.03 | EO4_Bro | 0.41 $\pm$ 0.05 | VM3_Pur | 0.19 $\pm$ 0.01 |
| EO2_Pur | 0.50 $\pm$ 0.12 | EO4_Pur | 0.59 $\pm$ 0.01 | VM3_Lpu | 0.20 $\pm$ 0.02 |
| EO2_Red | 0.53 $\pm$ 0.15 | EO4_Red | 0.59 $\pm$ 0.05 | VM4_Bla | 0.19 $\pm$ 0.01 |
| EO2_Lpu | 0.54 $\pm$ 0.08 | CP1_Pur | 0.53 $\pm$ 0.02 | VM4_Pur | 0.17 $\pm$ 0.02 |
| EO2_Pin | 0.58 $\pm$ 0.08 | CA1_Yew | 0.37 $\pm$ 0.06 | VM4_Bro | 0.17 $\pm$ 0.02 |
| EO2_Lpi | 0.46 $\pm$ 0.01 | VM1_Pur | 0.21 $\pm$ 0.02 | CN1_Bla | 0.51 $\pm$ 0.02 |
| EO3_Bro | 0.52 $\pm$ 0.03 | VM2_Bla | 0.31 $\pm$ 0.03 | 366_Bla | 0.40 $\pm$ 0.04 |
| EO3_Pur | 0.53 $\pm$ 0.04 | VM2_Pur | 0.31 $\pm$ 0.02 | ATF_Bla | 0.40 $\pm$ 0.00 |

**Table S1.** Average weights in g of individual kernels. The names of the landraces and Vitamaize entries and the phenotypic color were abbreviated and joined to form a code for subsequent analysis. The first part of the code corresponds to genotype: Elote Occidental (EO), Criollo Amarillo (CA1), Vitamaize (VM), Conico Negro (CN1). The second part of the code corresponds to the kernel color with following abbreviations: purple (Pur), light purple (Lpu), pink (Pin), light pink (Lpi), brown (Bro), yellow (Yew), and black (Bla).

Dry weights in g of individual kernels. Raw data:

| Code    | Sample I | Sample II | Sample III | Code    | Sample I | Sample II | Sample III |
|---------|----------|-----------|------------|---------|----------|-----------|------------|
| EO1_Pur | 0.576    | 0.568     | 0.626      | CP1_Pur | 0.525    | 0.507     | 0.558      |
| EO1_Red | 0.543    | 0.506     | 0.567      | CA1_Yew | 0.420    | 0.392     | 0.297      |
| EO1_Lpu | 0.611    | 0.561     | 0.588      | VM1_Pur | 0.200    | 0.200     | 0.231      |
| EO2_Pur | 0.64     | 0.438     | 0.418      | VM2_Bla | 0.332    | 0.283     | 0.328      |
| EO2_Red | 0.384    | 0.54      | 0.674      | VM2_Pur | 0.332    | 0.296     | 0.302      |
| EO2_Lpu | 0.525    | 0.563     | 0.544      | VM2_Lpu | 0.301    | 0.273     | 0.26       |
| EO2_Pin | 0.63     | 0.622     | 0.482      | VM2_Yew | 0.34     | 0.33      | 0.284      |
| EO2_Lpi | 0.449    | 0.466     | 0.457      | VM3_Pur | 0.189    | 0.191     | 0.202      |
| EO3_Bro | 0.486    | 0.552     | 0.519      | VM3_Lpu | 0.172    | 0.211     | 0.204      |
| EO3_Pur | 0.565    | 0.492     | 0.526      | VM4_Bla | 0.182    | 0.182     | 0.195      |
| EO3_Red | 0.402    | 0.444     | 0.403      | VM4_Pur | 0.186    | 0.151     | 0.181      |
| EO3_Lpu | 0.461    | 0.445     | 0.53       | VM4_Bro | 0.181    | 0.141     | 0.179      |
| EO4_Bro | 0.368    | 0.471     | 0.392      | CN1_Bla | 0.522    | 0.486     | 0.528      |
| EO4_Pur | 0.418    | 0.407     | 0.391      | 366_Bla | 0.359    | 0.436     | 0.403      |
| EO4_Red | 0.271    | 0.346     | 0.37       | ATF_Bla | 0.403    | 0.406     | 0.397      |

**Table S2.** List of anthocyanins detected with the Neutral Loss Method (MS2 data).

| Molecule                                               | Fragment loss of | Parent ion $m/z$ |
|--------------------------------------------------------|------------------|------------------|
| cyanidin-3- <i>O</i> -glucoside                        | 162 Da           | 449              |
| pelargonidn-3- <i>O</i> -glucoside                     | 162 Da           | 433              |
| peonidin-3- <i>O</i> -glucoside                        | 162 Da           | 463              |
| cyanidin-3- <i>O</i> -(6"-malonyl-glucoside)           | 248 Da           | 535              |
| pelargonidn-3- <i>O</i> -(6"-malonyl-glucoside)        | 248 Da           | 519              |
| peonidin-3- <i>O</i> -(6"-malonyl-glucoside)           | 248 Da           | 549              |
| cyanidin-3- <i>O</i> -(6"-succinyl-glucoside)          | 262 Da           | 549              |
| pelargonidn-3- <i>O</i> -(6"-succinyl-glucoside)       | 262 Da           | 533              |
| peonidin-3- <i>O</i> -(6"-succinyl-glucoside)          | 262 Da           | 563              |
| cyanidin-3- <i>O</i> -(dimalonyl-glucoside)            | 334 Da           | 619              |
| pelargonidn-3- <i>O</i> -(dimalonyl-glucoside)         | 334 Da           | 605              |
| peonidin-3- <i>O</i> -(dimalonyl-glucoside)            | 334 Da           | 635              |
| cyanidin-3- <i>O</i> -(malonyl, succinyl-glucoside)    | 348 Da           | 635              |
| pelargonidn-3- <i>O</i> -(malonyl, succinyl-glucoside) | 348 Da           | 619              |
| peonidin-3- <i>O</i> -(malonyl, succinyl-glucoside)    | 348 Da           | 649              |
| cyanidin-3- <i>O</i> -(disuccinyl-glucoside)           | 362Da            | 649              |
| pelargonidn-3- <i>O</i> -(disuccinyl-glucoside)        | 362Da            | 633              |
| peonidin-3- <i>O</i> -(disuccinyl-glucoside)           | 362Da            | 663              |

## MS/MS protocols

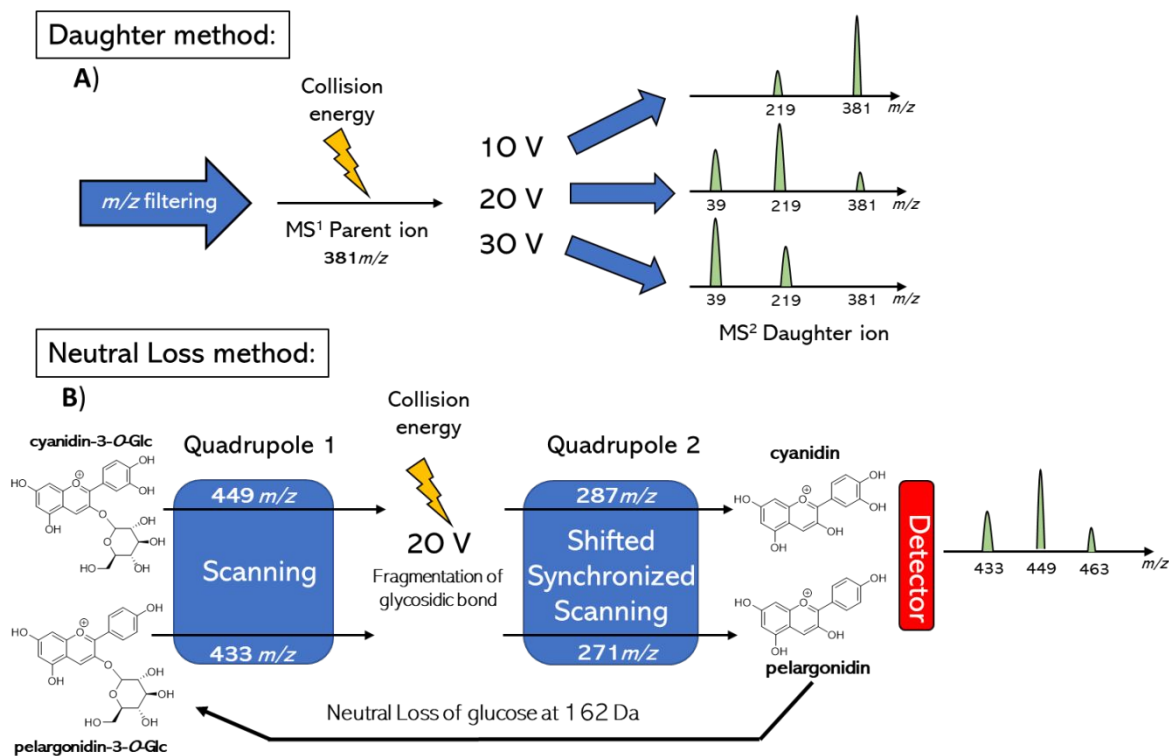

**Figure S1.** Overview of the two MS/MS methods employed to identify candidate ions. The combination of both methods allowed to tentatively assign ions a chemical structure and thus give them a name.

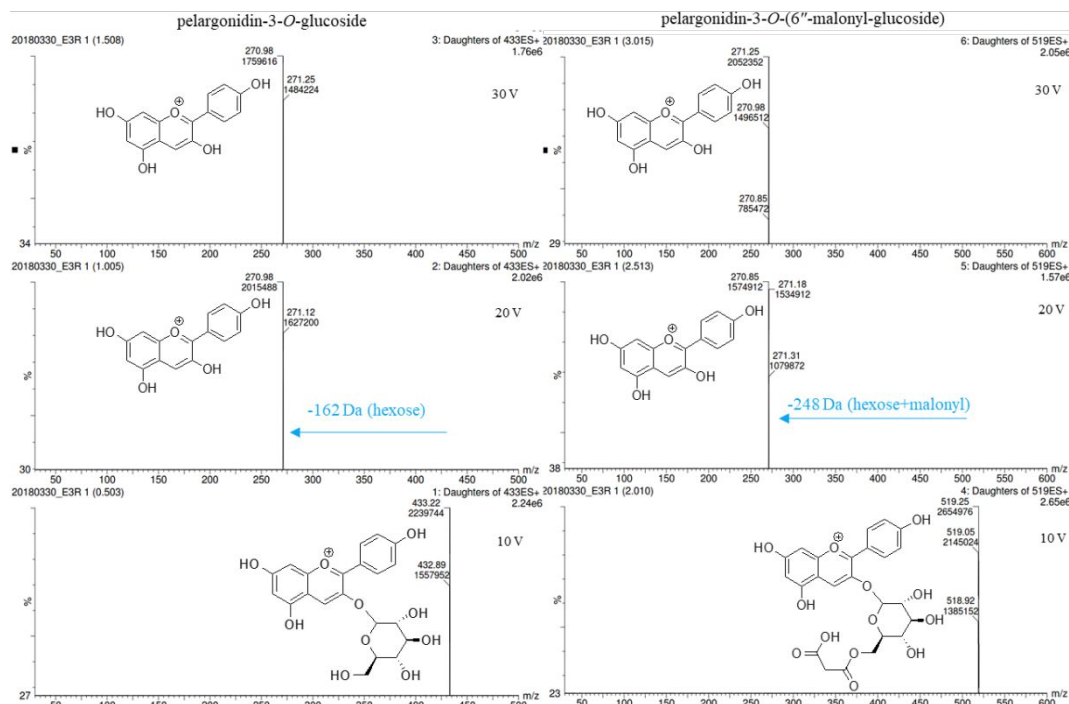

**Figure S2.** Mass spectra for pelargonidin-3-*O*-glucoside and pelargonidin-3-*O*-(6''-malonyl-glucoside). Data was obtained with Daughters method in MassLynx 4.1 using 10 V, 20 V, and 30 V. Representative data is shown (sample EO3\_Red).

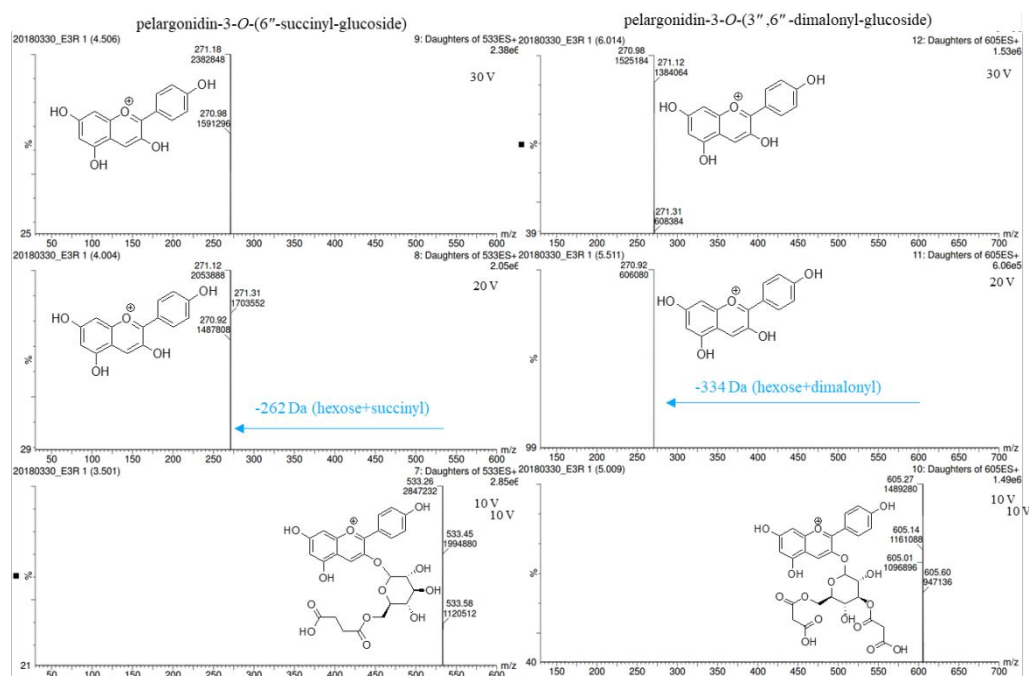

**Figure S3.** Mass spectra for pelargonidin-3-*O*-(6''-succinyl-glucoside) and pelargonidin-3-*O*-(3'',6''-dimalonyl-glucoside). Data was obtained with Daughters method in MassLynx 4.1 using 10 V, 20 V, and 30 V. Representative data is shown (sample EO3\_Red).

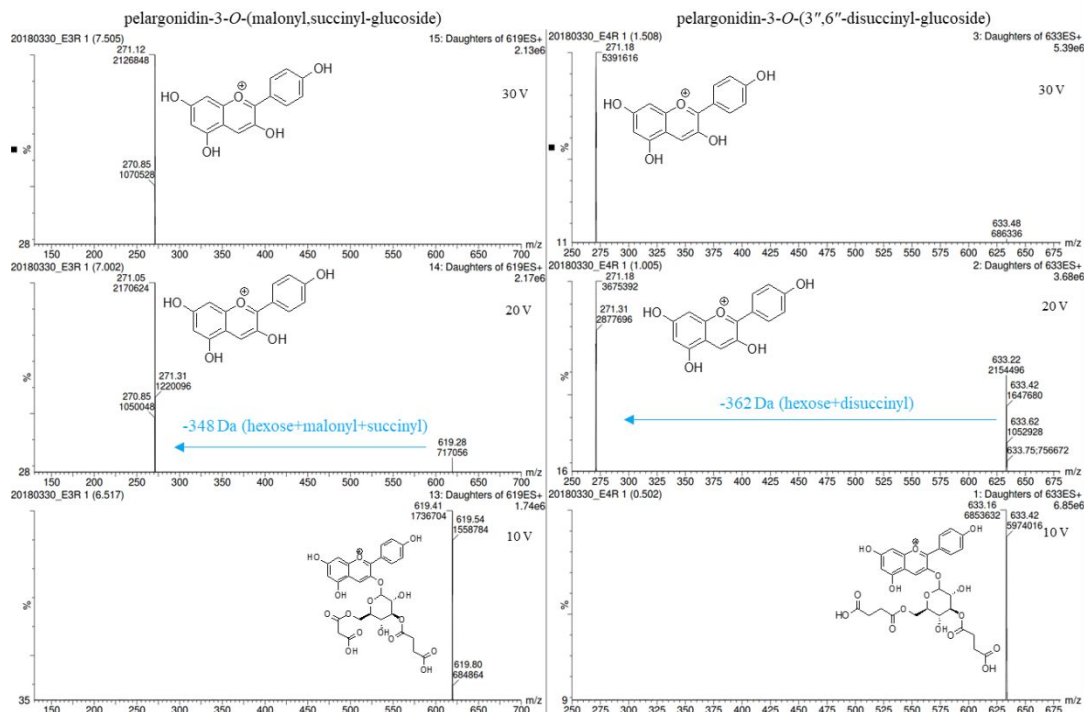

**Figure S4.** Mass spectra for pelargonidin-3-*O*-(malonyl, succinyl-glucoside) and pelargonidin-3-*O*-(disuccinyl-glucoside). Data was obtained with Daughters method in MassLynx 4.1 using 10 V, 20 V, and 30 V. Representative data is shown (sample EO3\_Red).

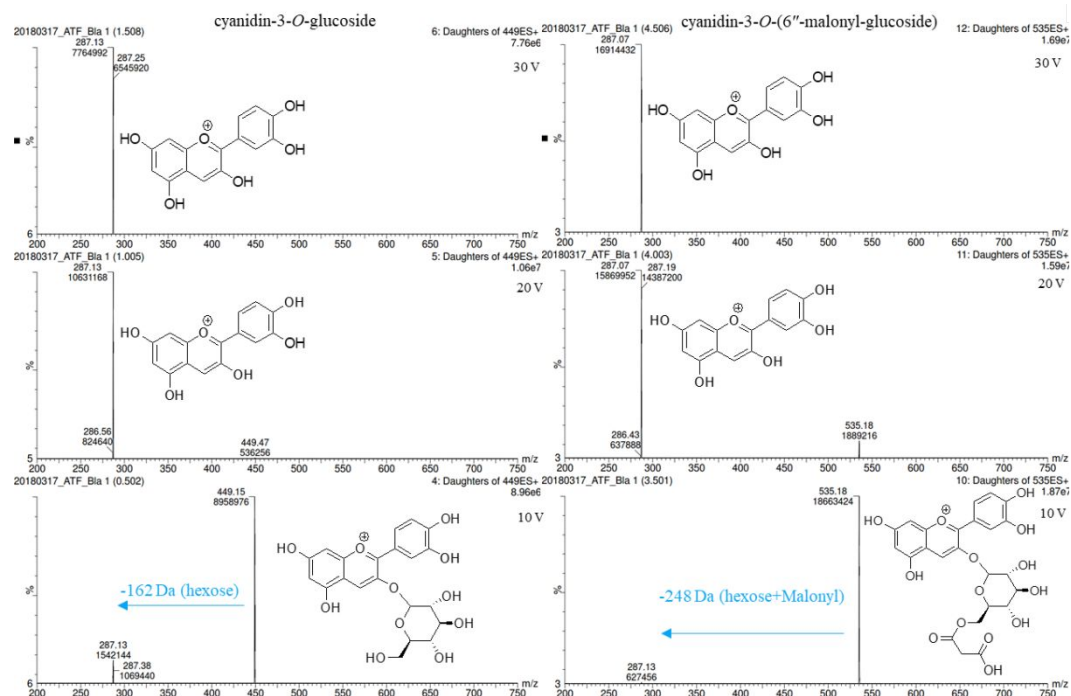

**Figure S5.** Mass spectra for cyanidin-3-*O*-glucoside and cyanidin-3-*O*-(6''-malonyl-glucoside). Data was obtained with Daughters method in MassLynx 4.1 using 10 V, 20 V, and 30 V. Representative data is shown (sample ATF\_Black).

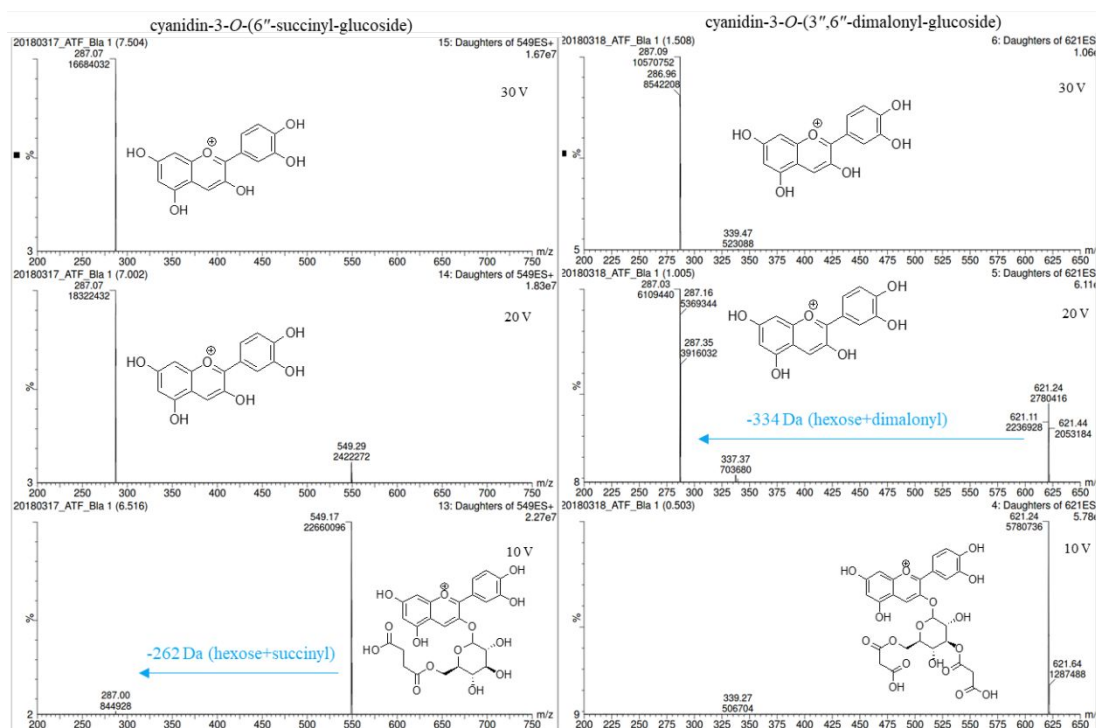

**Figure S6.** Mass spectra for cyanidin-3-(6''-succinyl)-O-glucoside and cyanidin-3-O-(dimalonyl)-glucoside). Data was obtained with Daughters method in MassLynx 4.1 using 10 V, 20 V, and 30 V. Representative data is shown (sample ATF\_Black).

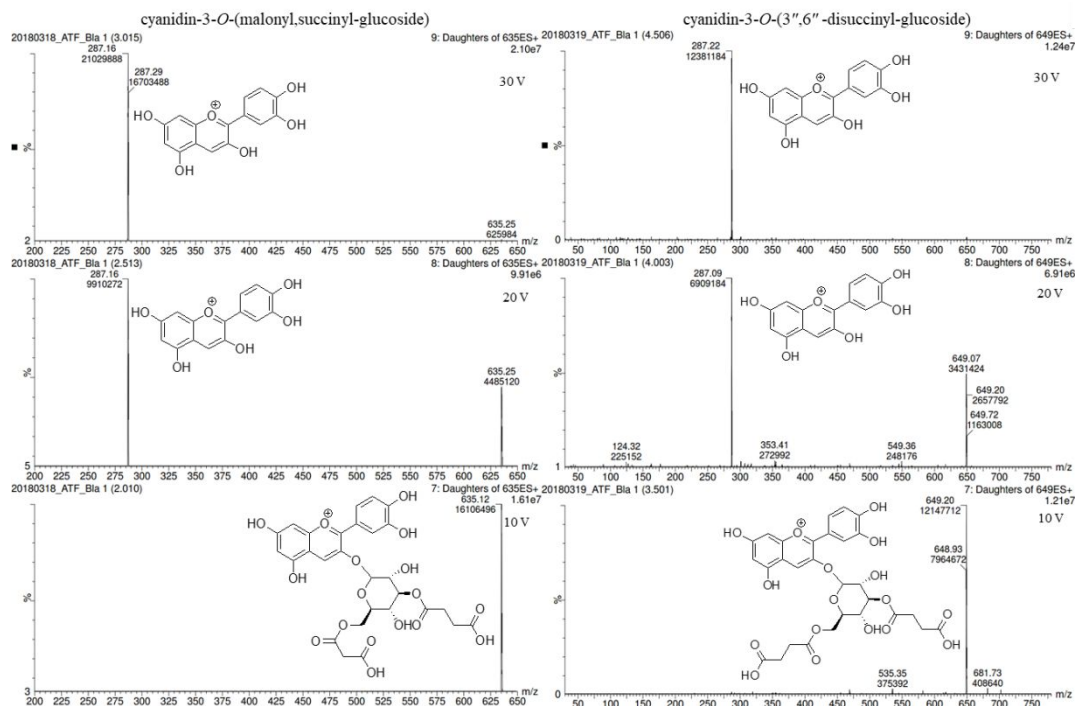

**Figure S7.** Mass spectra for cyanidin-3-O-(malonyl, succinyl)-glucoside and cyanidin-3-O-(disuccinyl)-glucoside. Data was obtained with Daughters method in MassLynx 4.1 using 10 V, 20 V, and 30 V. Representative data is shown (sample ATF\_Black).

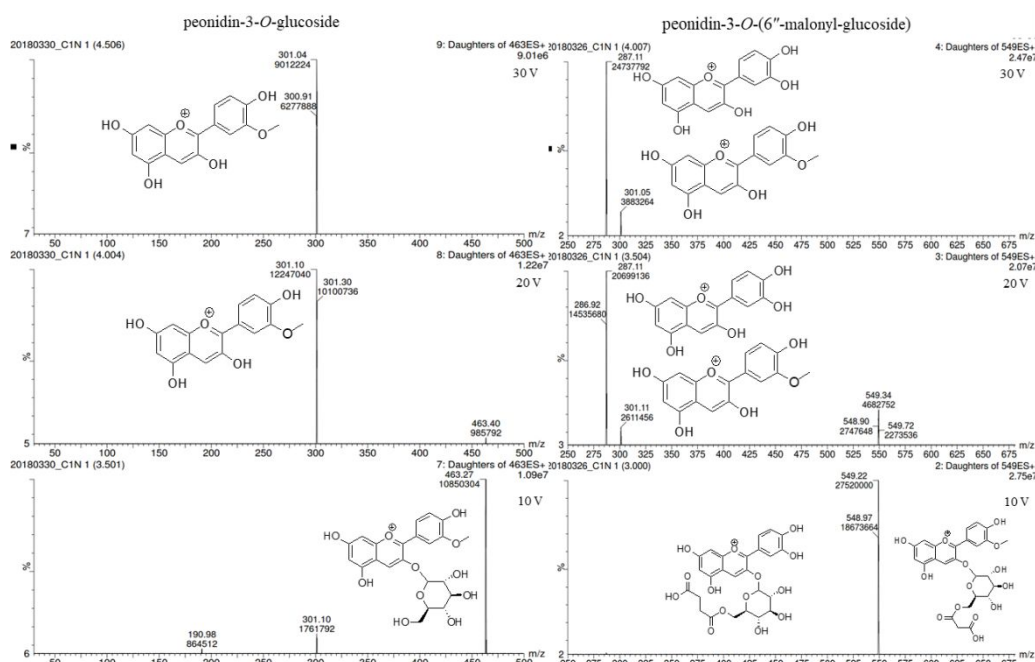

**Figure S8.** Mass spectra for peonidin-3-O-glucoside and peonidin-3-O-(6''-malonyl-glucoside) mixed with cyanidin-3-O-(6''-succinyl-glucoside). Data was obtained with Daughters method in MassLynx 4.1 using 10 V, 20 V, and 30 V. Representative data is shown (sample CN1\_Black).

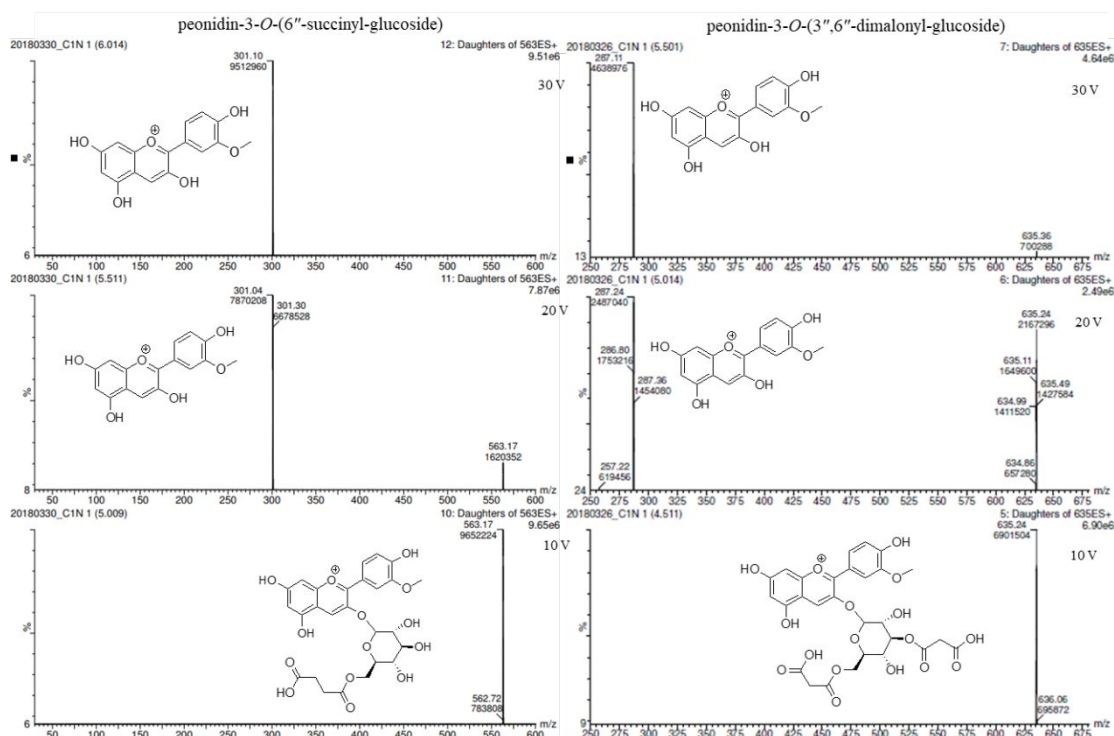

**Figure S9.** Mass spectra for peonidin-3-O-(6''-succinyl-glucoside) and peonidin-3-O-(malonyl, succinyl-glucoside) mixed with cyanidin-3-O-(disuccinyl-glucoside). Data was obtained with Daughters method in MassLynx 4.1 using 10 V, 20 V, and 30 V. Representative data is shown (sample CN1\_Black).



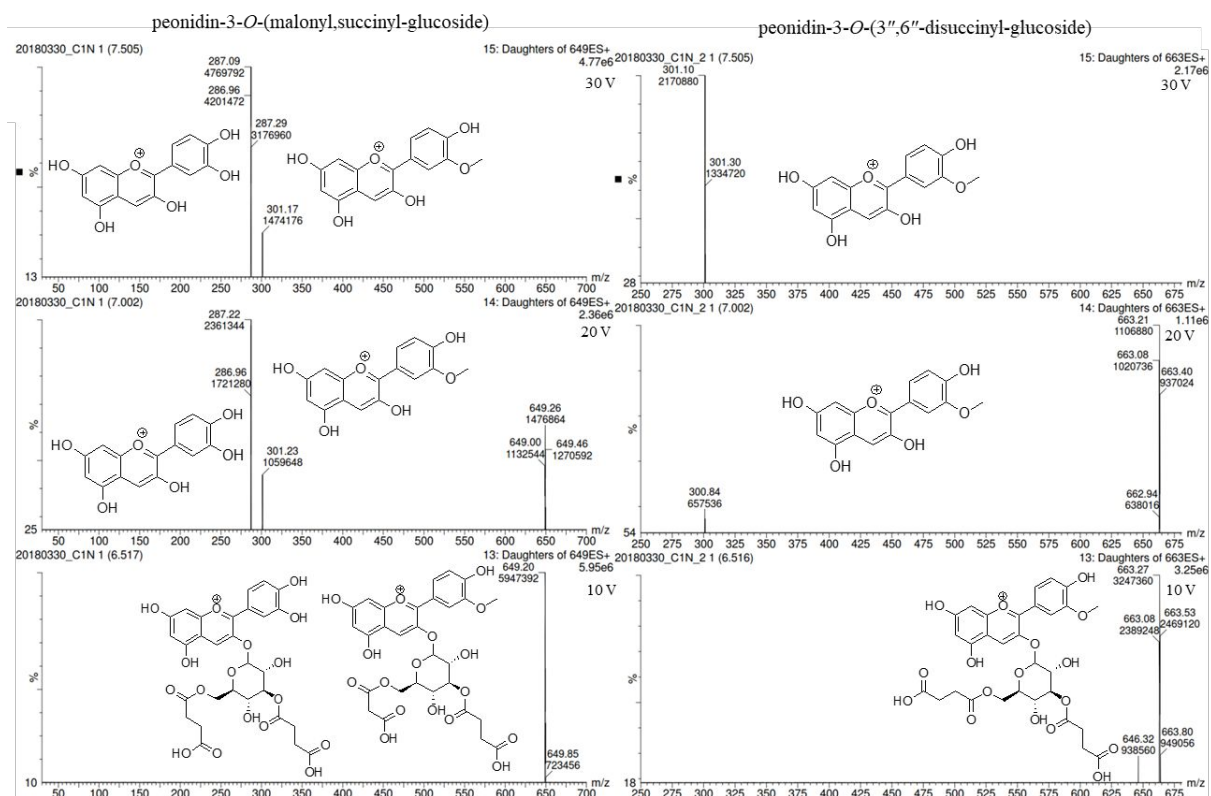

**Figure S10.** Mass spectra for the presumed peonidin-3-*O*-(malonyl-glucoside) and cyanidin-3-*O*-(disuccinyl-glucoside) and peonidin-3-*O*-(disuccinyl-glucoside) at 649 *m/z* and 663 *m/z*, respectively. The mass spectra were obtained with Daughters method in MassLynx 4.1 using 10 V, 20 V, and 30 V. The sample used was CN1\_Black



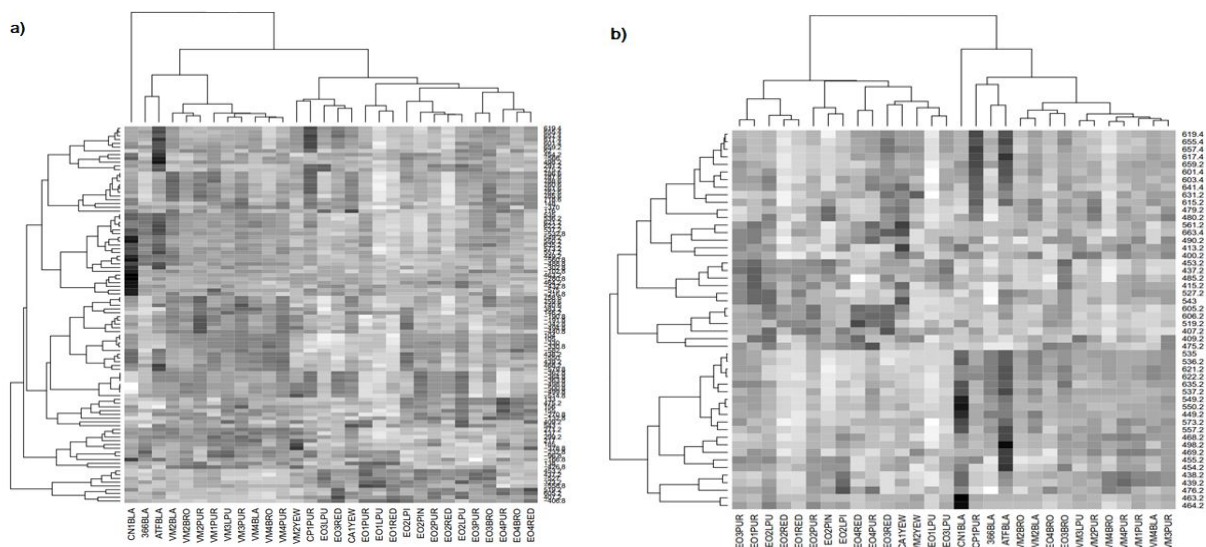

**Figure S11.** Heat maps using the most significant ions according to their  $p$ -value for the entry factor in the ANOVA model. In figure a) 100 ions detected in positive and negative ionization mode. It shows three clusters: one for Vitamaize and another one for “Elote occidental” landrace, while “Conico negro” is alone as a third clustered. In Figure b) the hierarchical clustering was done selecting ions only from the range 400-700 m/z. It forms two clusters: one of samples with high anthocyanin concentration which included Vitamaize and brown colored kernels from “Elote occidental”, purple grain from “Pozolero purpura”, and “Conico negro”. The second cluster grouped the rest of the samples: pale, red and purple colored landraces.

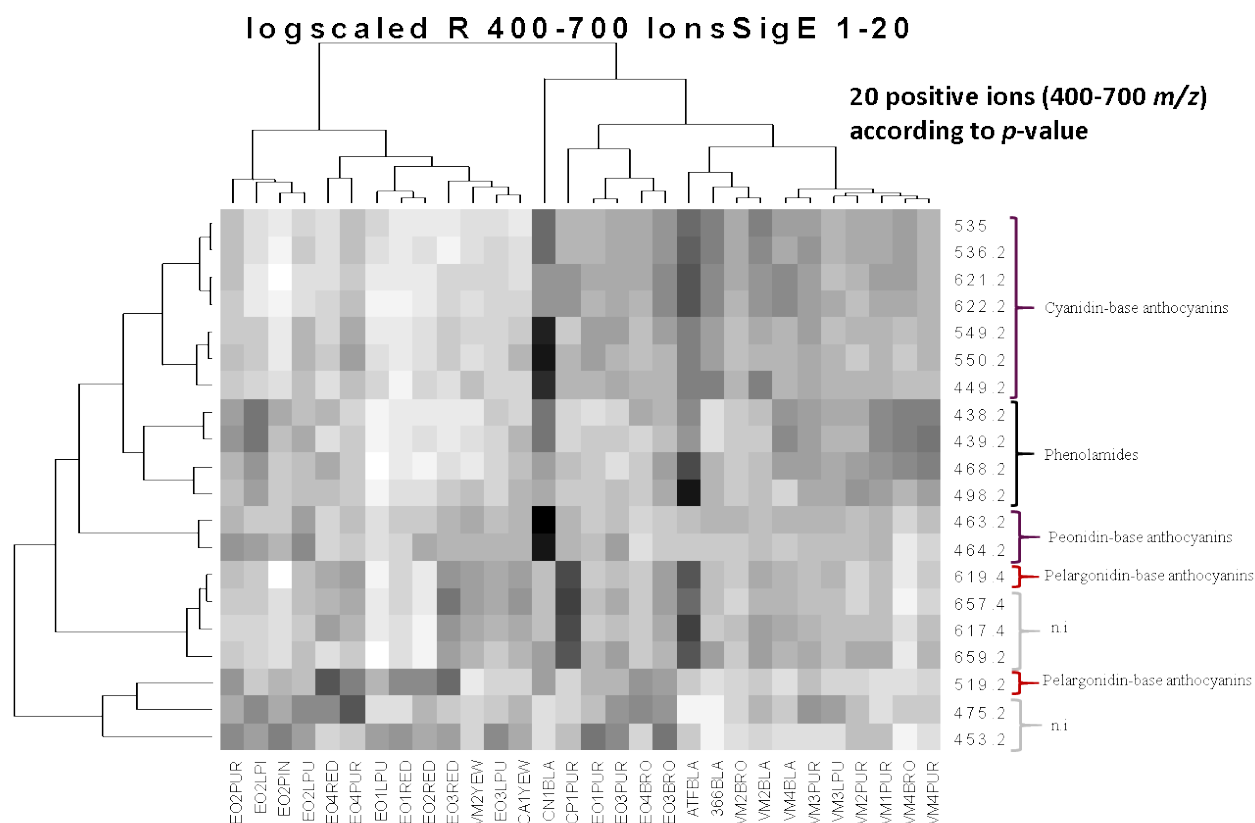

**Figure S12.** Heatmap using the most significant ions according to their p-value for the entry factor in the ANOVA model. The hierarchical clustering was done selecting the first 20 ions in the range from 400-700 m/z, which formed two clusters: one with higher anthocyanin concentration which included Vitamaize and brown colored kernels from “Elote occidental” purple grain from “Pozolero purpura”, and “Conico negro”. The second cluster grouped the rest: pale, red and purple colored genotypes.

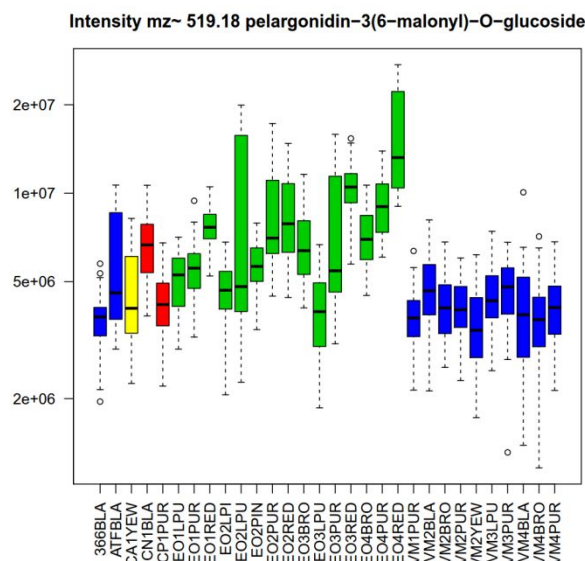

**Figure S13.** Boxplot distribution for pelargonidin-3-*O*-(6''-malonyl-glucoside) among different maize genotypes. It shows higher signal intensities for the “Elote Occidental” landrace in comparison to the other genotypes. The rectangles represent the first and third quartiles (boxes) and the median value (midline). The bars indicate the minimum and maximum values, whereas empty points represent data outliers.

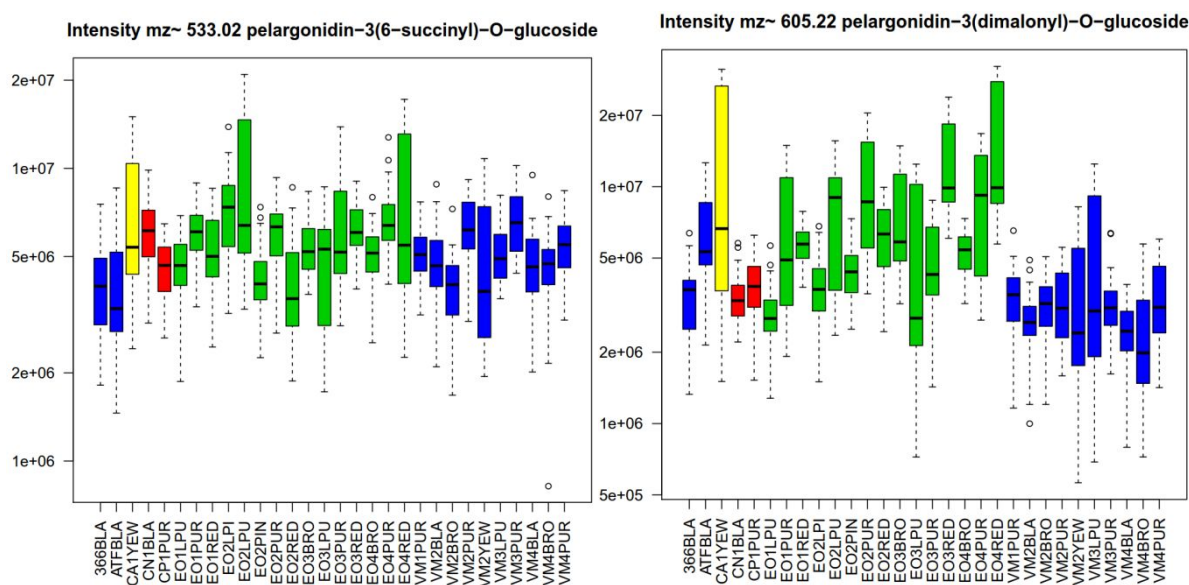

**Figure S14.** Boxplot distribution for ions corresponding to pelargonidin-3-*O*-(6''-succinyl-glucoside) and pelargonidin-3-*O*-(dimalonyl-glucoside).

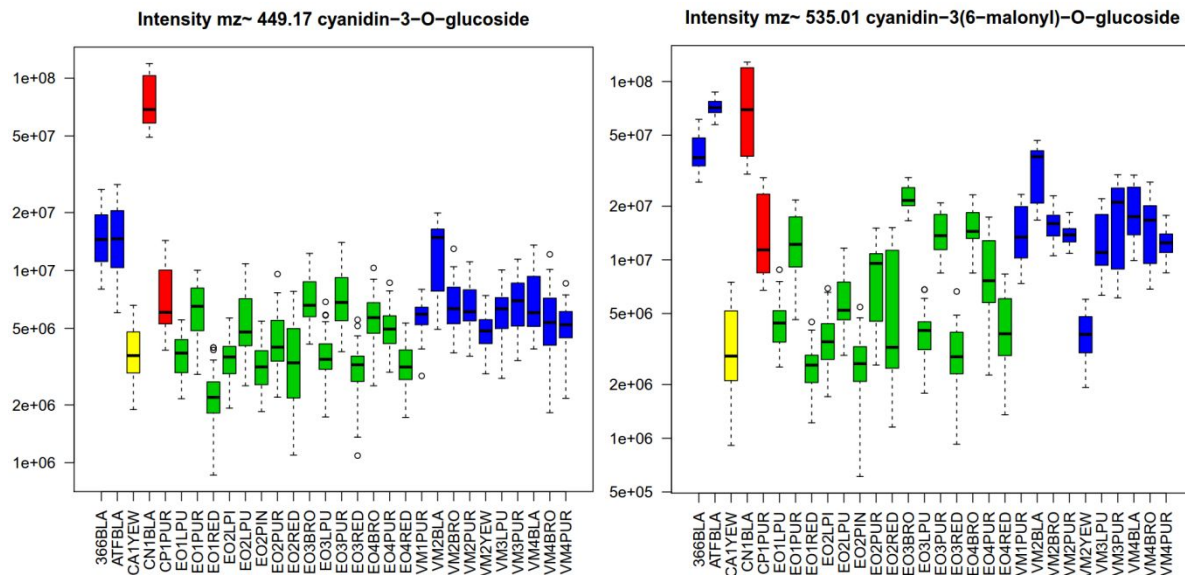

**Figure S15.** Boxplot distribution for ions corresponding to cyanidin-3-*O*-glucoside and cyanidin-3-*O*-(6''-malonyl-glucoside). Higher intensities correspond to kernel colors black, purple, and brown but Ven greater in CN1\_Bla and vitamaize lines 366\_Bla and ATF\_Bla. Red and pale color kernels presented the lowest intensities.

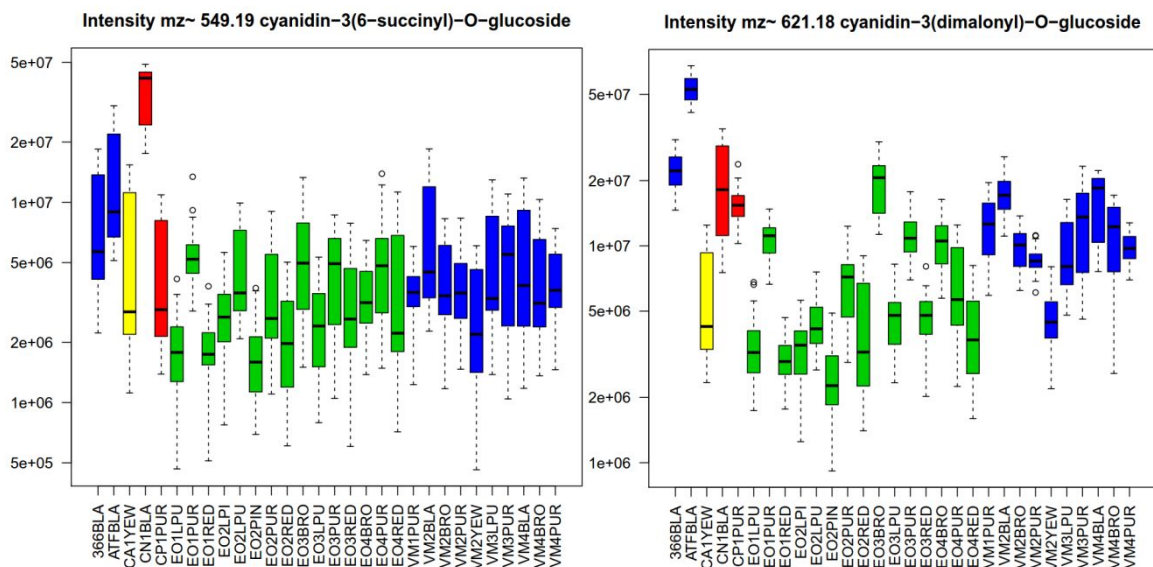

**Figure S16.** Boxplots distribution for cyanidin-3-*O*-(6''-succinyl-glucoside) and cyanidin-3-*O*-(dimalonyl-glucoside). These boxplots shown that higher intensities in both ions correspond to kernel colors black, purple, and brown but Ven greater in CN1\_Bla and vitamaize lines as 366\_Bla and ATF\_Bla. Red and pale color kernels presented lower intensities.

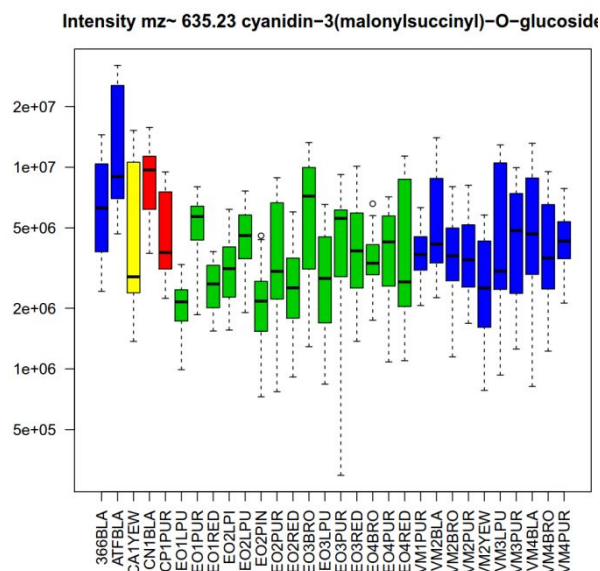

**Figure S17.** Boxplot distribution for cyanidin-3-*O*-(malonyl-succinyl)-glucoside. The ion had greater intensities in kernel colors like black, purple, and brown but Ven greater in CN1\_Bla and vitamaize lines as 366\_Bla and ATF\_Bla. Red and pale color kernels presented the lower intensities.

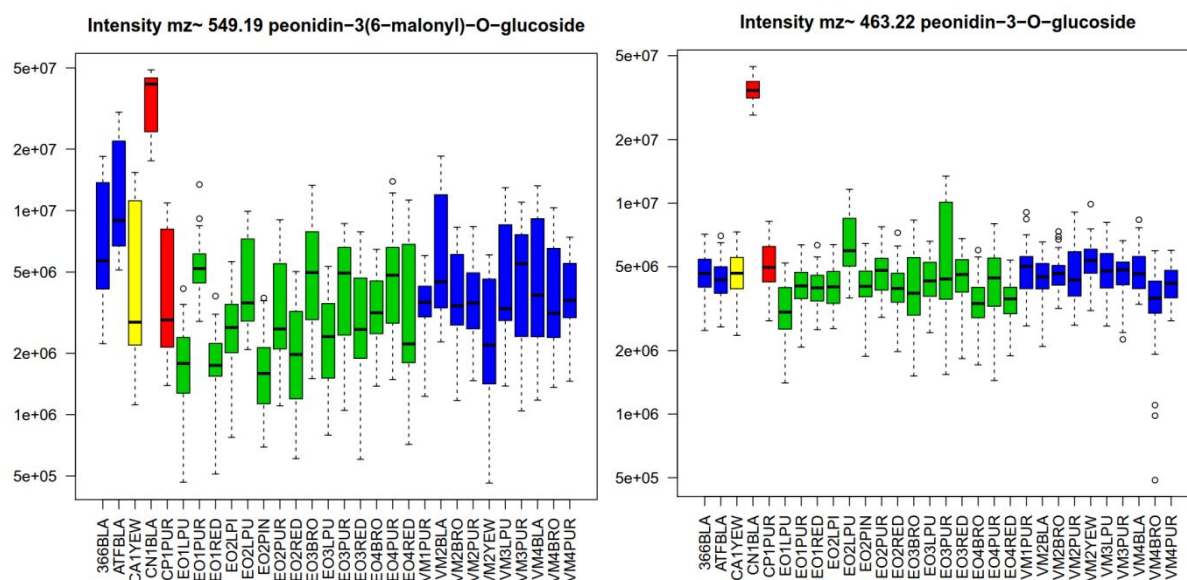

**Figure S18.** Boxplots for peonidin-3-*O*-(6''-malonyl-glucoside) and peonidin-3-*O*-glucoside. Both ions were highest in the CN1\_Bla genotype.
